# Supplementary material for: Atomic adsorption on graphene with a single vacancy: systematic DFT study through the periodic table of elements
Source: Royal Society of Chemistry journal article supplement (doi:10.1039/c7cp07542a), 2017-12-04
Supplement: c7cp07542a1.xlsx [file c7cp07542a1.xlsx]

## Sheet: Sheet1
Calculated distances of atoms adsorbed at SV−graphene from the graphene plane (in Å)
atomic number	element	PBE	PBE+D2	PBE+D3	vdW-DF2
1	H	0.0231295	0.0230192	0.0263029	0.28404
2	He	3.274	3.03776	3.03749	2.98791
3	Li	1.68747	1.72988	1.69028	1.58323
4	Be	0.842314	0.855923	0.854983	0.79793
5	B	0.0428522	0.0469837	0.0334254	0.0276777
6	C	0	0	0	0
7	N	0.00999816	0.0092865	0.0099072	0.00604019
8	O	0.315096	0.316051	0.316439	0.327002
9	F	1.65446	1.65519	1.65292	1.54169
10	Ne	2.87729	2.70544	2.76333	2.78208
11	Na	2.14226	2.11152	2.16873	2.15977
12	Mg	1.75397	1.74068	1.75661	1.79686
13	Al	1.38824	1.39073	1.39074	1.39004
14	Si	1.1666	1.16888	1.18608	1.18578
15	P	1.15299	1.16372	1.16446	1.19144
16	S	1.06303	1.0731	1.07318	1.07317
17	Cl	2.13586	2.13887	2.13496	2.16999
18	Ar	3.35927	3.14529	3.19168	3.19096
19	K	2.49076	2.43578	2.52806	2.50262
20	Ca	1.97446	1.95154	1.98591	2.06334
21	Sc	1.7352	1.7423	1.74443	1.78717
22	Ti	1.47438	1.48073	1.48402	1.51946
23	V	1.39931	1.41839	1.41874	1.46533
24	Cr	1.35858	1.38167	1.37524	1.42691
25	Mn	1.29313	1.29689	1.2972	1.32714
26	Fe	1.22186	1.23759	1.22237	1.25418
27	Co	1.17921	1.18945	1.18166	1.22551
28	Ni	1.19226	1.19545	1.19511	1.23596
29	Cu	1.2895	1.30316	1.29332	1.38764
30	Zn	1.44539	1.45586	1.43927	1.60589
31	Ga	1.37158	1.37877	1.37475	1.47975
32	Ge	1.42732	1.43626	1.43431	1.54244
33	As	1.45819	1.45842	1.46369	1.52385
34	Se	1.34522	1.35475	1.35484	1.38123
35	Br	2.32021	2.32052	2.3312	2.36149
36	Kr	3.71021	3.30371	3.36154	3.37971
37	Rb	2.64093	2.56021	2.67924	2.66105
38	Sr	2.1354	2.10667	2.15091	2.25207
39	Y	1.93896	1.93966	1.95018	1.9971
40	Zr	1.70441	1.71851	1.71765	1.77268
41	Nb	1.61961	1.63369	1.62952	1.67992
42	Mo	1.57791	1.59216	1.58675	1.63727
43	Tc	1.51422	1.5213	1.51043	1.57106
44	Ru	1.46357	1.47583	1.47576	1.54827
45	Rh	1.46031	1.43853	1.43895	1.51996
46	Pd	1.44719	1.45865	1.45435	1.5353
47	Ag	1.74634	1.76322	1.76266	2.0325
48	Cd	2.43224	2.3532	2.60932	3.31441
49	In	2.10738	2.10302	2.13511	2.26763
50	Sn	1.93137	1.93873	1.93559	1.99596
51	Sb	1.81935	1.85566	1.85308	1.86253
52	Te	1.69423	1.696	1.6945	1.73058
53	I	2.53973	2.52794	2.54419	2.6274
54	Xe	3.65655	3.17011	3.34671	3.17757
55	Cs	2.78753	2.5322	2.80846	2.81515
56	Ba	2.26915	2.20293	2.27761	2.37302
57	La	2.02869	2.02881	2.03804	2.11536
72	Hf	1.66459	1.66915	1.66531	1.72075
73	Ta	1.5881	1.60126	1.59472	1.65484
74	W	1.58381	1.58719	1.58466	1.61674
75	Re	1.54004	1.55623	1.5456	1.58472
76	Os	1.5117	1.51744	1.51712	1.55441
77	Ir	1.48571	1.48769	1.48609	1.52775
78	Pt	1.46725	1.48212	1.48237	1.52552
79	Au	1.63744	1.65861	1.64849	1.81652
80	Hg	3.48253	2.85464	2.99846	3.31475
81	Tl	2.43597	2.43494	2.55212	2.50107
82	Pb	2.12816	2.13209	2.13072	2.1925
83	Bi	1.97911	1.98695	1.98319	2.03465
84	Po	1.84473	1.85793	1.84479	1.90221
85	At	2.65192	2.64641	2.64744	2.74134
86	Rn	3.63739	3.28409	3.38473	3.45426
