# Supplementary material for: Atomic adsorption on graphene with a single vacancy: systematic DFT study through the periodic table of elements
Source: Royal Society of Chemistry journal article supplement (doi:10.1039/c7cp07542a), 2017-12-04
Supplement: c7cp07542a2.xlsx [file c7cp07542a2.xlsx]

## Sheet: Sheet1
Calculated adsorption energies of atom in PTE on SV−graphene (in eV)
atomic number	element	PBE	PBE+D2	PBE+D3	vdW-DF2
1	H	-3.29	-3.37	-3.33	-3.41
2	He	-0.01	-0.02	-0.03	-0.02
3	Li	-2.65	-2.94	-2.72	-2.59
4	Be	-6.17	-6.3	-6.23	-6.29
5	B	-12.91	-13.04	-12.96	-11.76
6	C	-15.6	-15.7	-15.64	-15.6
7	N	-12.02	-12.11	-12.07	-9.51
8	O	-7.77	-7.85	-7.83	-5.41
9	F	-4.55	-4.67	-4.62	-2.43
10	Ne	nb	-0.04	-0.03	-0.04
11	Na	-1.88	-2.2	-2	-1.74
12	Mg	-1.7	-1.98	-1.8	-1.4
13	Al	-5.15	-5.37	-5.23	-4.75
14	Si	-8.21	-8.38	-8.28	-7.62
15	P	-8.31	-8.47	-8.41	-7.7
16	S	-7.13	-7.27	-7.25	-6.08
17	Cl	-2.85	-3.03	-3.01	-2.51
18	Ar	0	-0.08	-0.09	-0.08
19	K	-2.09	-2.36	-2.22	-1.92
20	Ca	-3.18	-3.5	-3.27	-2.78
21	Sc	-6.48	-6.77	-6.59	-5.89
22	Ti	-8.03	-8.3	-8.14	-7.22
23	V	-7.27	-7.54	-7.38	-6.87
24	Cr	-6.16	-6.42	-6.28	-5.95
25	Mn	-6.18	-6.43	-6.31	-5.56
26	Fe	-7.1	-7.35	-7.23	-6.32
27	Co	-7.68	-7.92	-7.79	-6.64
28	Ni	-6.64	-6.89	-6.78	-5.72
29	Cu	-3.61	-3.87	-3.75	-2.89
30	Zn	-1.05	-1.32	-1.18	-0.3
31	Ga	-3.96	-4.24	-4.07	-3.08
32	Ge	-6.3	-6.54	-6.39	-5.59
33	As	-6.62	-6.84	-6.74	-6.04
34	Se	-5.6	-5.79	-5.74	-4.61
35	Br	-2.2	-2.43	-2.39	-1.89
36	Kr	-0.01	-0.12	-0.12	-0.13
37	Rb	-2.06	-2.41	-2.23	-1.88
38	Sr	-2.83	-3.23	-2.93	-2.39
39	Y	-6.21	-6.6	-6.32	-5.57
40	Zr	-8.34	-8.71	-8.45	-7.51
41	Nb	-8.15	-8.52	-8.26	-7.74
42	Mo	-7.29	-7.65	-7.43	-6.93
43	Tc	-8.26	-8.61	-8.47	-7.31
44	Ru	-8.81	-9.16	-8.99	-7.67
45	Rh	-8.34	-8.69	-8.49	-7.05
46	Pd	-5.27	-5.62	-5.44	-4.3
47	Ag	-1.72	-2.11	-1.89	-1.28
48	Cd	-0.1	-0.47	-0.34	-0.19
49	In	-2.12	-2.58	-2.28	-1.94
50	Sn	-4.28	-4.64	-4.39	-3.96
51	Sb	-4.98	-5.29	-5.01	-4.72
52	Te	-4.24	-4.51	-4.42	-3.41
53	I	-1.67	-1.97	-1.89	-1.44
54	Xe	-0.03	-0.15	-0.16	-0.11
55	Cs	-2.2	-3.33	-2.37	-2.01
56	Ba	-3.38	-4.39	-3.49	-2.9
57	La	-6.7	-7.62	-6.81	-5.98
72	Hf	-8.6	-9.17	-8.71	-7.64
73	Ta	-8.99	-9.5	-9.13	-7.92
74	W	-8.52	-9.03	-8.72	-8
75	Re	-8.13	-8.63	-8.37	-7.31
76	Os	-9.29	-9.79	-9.53	-8.03
77	Ir	-9.28	-9.77	-9.45	-7.67
78	Pt	-7.08	-7.57	-7.34	-6.02
79	Au	-2.4	-2.93	-2.6	-1.8
80	Hg	-0.03	-0.4	-0.29	-0.19
81	Tl	-2.12	-2.5	-2.38	-1.96
82	Pb	-3.31	-3.69	-3.46	-3.1
83	Bi	-4.06	-4.46	-4.19	-3.83
84	Po	-3.38	-3.68	-3.58	-2.56
85	At	-1.41	-1.77	-1.67	-1.22
86	Rn	0	-0.24	-0.18	-0.15
