# Supplementary material for: Atomic adsorption on graphene with a single vacancy: systematic DFT study through the periodic table of elements
Source: Royal Society of Chemistry journal article supplement (doi:10.1039/c7cp07542a), 2017-12-04
Supplement: c7cp07542a3.xlsx [file c7cp07542a3.xlsx]

## Sheet: Sheet1
Ground state magnetizations of A@v−G systems (in Bohr magnetons, μB).
atomic number	element	PBE	PBE+D2	PBE+D3	vdW-DF2
1	H	2.74	2.74	2.74	2.48
2	He	1.36	1.36	1.36	1.38
3	Li	0.82	0.82	0.82	2.2
4	Be	0	0	0	0
5	B	0	0	0	0
6	C	0	0	0	0
7	N	0	0	0	0
8	O	0	0	0	0
9	F	0	0	0	0
10	Ne	1.36	1.37	1.36	1.38
11	Na	0.98	0.98	0.98	0.98
12	Mg	1.94	1.94	1.94	1.89
13	Al	0	0	0	0
14	Si	0	0	0	0
15	P	0	0	0	0
16	S	0	0	0	0
17	Cl	0.01	0	0	0.39
18	Ar	1.36	1.37	1.37	1.45
19	K	1	1	1	0.99
20	Ca	1.89	1.9	1.89	1.82
21	Sc	0	0	0	0
22	Ti	0	0	0	0
23	V	1.01	1.01	1.01	1.01
24	Cr	2.01	2.02	2.01	2.05
25	Mn	2.84	2.83	2.84	2.76
26	Fe	0	0	0	0
27	Co	0.28	0.28	0.28	0
28	Ni	0	0	0	0
29	Cu	0.87	0.77	0.93	0.94
30	Zn	1	1.18	1.12	1.78
31	Ga	0	0	0	0
32	Ge	0	0	0	0
33	As	0	0	0	0
34	Se	0	0	0	0
35	Br	0	0	0	0
36	Kr	1.36	1.37	1.37	1.38
37	Rb	1	1	1	1
38	Sr	1.96	1.96	1.96	1.93
39	Y	0	0	0	0
40	Zr	0	0	0	0
41	Nb	0.97	0.97	0.97	0.97
42	Mo	1.98	1.98	1.98	1.99
43	Tc	0.94	0.94	0.93	0.95
44	Ru	0	0	0	0
45	Rh	0	0	0	0
46	Pd	0	0	0	0
47	Ag	1.02	1	1	0.95
48	Cd	1.69	1.72	1.5	1.31
49	In	2.33	2.34	2.3	2.22
50	Sn	0	0	0	0
51	Sb	0	0	0	0
52	Te	0	0	0	0
53	I	0.02	0.07	0.15	0.6
54	Xe	1.37	1.42	1.39	1.41
55	Cs	1	1	1	1
56	Ba	1.97	1.98	1.96	1.94
57	La	0	0	0	0
72	Hf	0	0	0	0
73	Ta	0.75	0.77	0.76	0.63
74	W	1.97	1.97	1.97	1.99
75	Re	0.94	0.93	0.94	1.02
76	Os	0	0	0	0
77	Ir	0.71	0.71	0.71	0
78	Pt	0	0	0	0
79	Au	1	1	1	0.59
80	Hg	1.34	1.4	1.38	1.35
81	Tl	0.81	0.8	0.82	0.77
82	Pb	0	0	0	0
83	Bi	0	0	0	0
84	Po	0	0	0	0
85	At	0.37	0.36	0.41	0.71
86	Rn	1.37	1.41	1.4	1.46
